# Supplementary material
Source: publisher figshare collection journal article supplement (https://gsajournals.figshare.com/ndownloader/files/30613116)
Supplement: Supplementary file 1 [file 30613116]

## Sheet: Sheet1
Table S7.Log2 fold-change (stress/control) of up- and down-regulated target genes of miRNAs with predicted binding sites within the MtnA 3’ UTR deletion region (miR-284-3p, miR-956-3p, miR-9c-5p and bantam-3p) and their associated p.adj values (DESeq2). Target genes that are down-regulated in both deletion and non-deletion lines are also indicated in the table. These 203 genes were then evaluated…
Target Genes (FBgn)	Name	Symbol	Annotation Symbol	Deletion Log2 fold-change	Deletion p.adj	Non-deletion Log2 fold-change	Non-deletion p.adj	Down-regulated in both genotypes
FBgn0028978	tribbles	trbl	CG5408	2.91871	2.05888e-42	2.00453	1.73533e-18
FBgn0261436	Dihydropterin deaminase	DhpD	CG18143	-1.37515	1.39231e-28	-1.09644	1.2208e-16
FBgn0000504	doublesex	dsx	CG11094	-1.71589	1.03035e-24	-1.40414	3.4039e-15	x
FBgn0025697	scavenger receptor acting in neural tissue and majority of rhodopsin is absent	santa-maria	CG12789	-1.37831	4.59387e-23	-1.00546	2.29818e-11	x
FBgn0032587	-	CG5953	CG5953	2.49311	2.39813e-22	2.14974	2.85324e-15	x
FBgn0086708	starvin	stv	CG32130	1.86989	1.8677e-21	1.19339	2.97026e-08
FBgn0036260	Rhodopsin 7	Rh7	CG5638	-0.99635	1.8677e-21	-0.4331	0.000303729
FBgn0020388	Gcn5 acetyltransferase	Gcn5	CG4107	0.660987	5.28616e-20	0.553391	9.60495e-13	x
FBgn0003475	spire	spir	CG10076	-0.645619	2.99978e-19	-0.373085	3.3308e-06
FBgn0000157	Distal-less	Dll	CG3629	-0.701924	1.87398e-16	-0.492575	1.37772e-07	x
FBgn0036836	-	CG11619	CG11619	1.79785	4.24903e-16	0.691063	0.00938496	x
FBgn0039419	-	CG12290	CG12290	1.27733	5.01406e-16	1.0951	9.73585e-11
FBgn0003285	roughest	rst	CG4125	-0.779317	3.64033e-15	-0.468292	2.31242e-05
FBgn0022740	HLH54F	HLH54F	CG5005	2.85523	9.59038e-15	0.990587	0.0283251	x
FBgn0286723	heimdall	hll	CG4500	3.1808	1.02622e-13	3.00181	1.78087e-11
FBgn0051072	lysosomal enzyme receptor protein	Lerp	CG31072	0.435657	1.76155e-13	0.390155	9.91637e-10
FBgn0037659	Lysine demethylase 2	Kdm2	CG11033	0.481691	1.80457e-12	0.325603	1.91635e-05
FBgn0022985	quaking related 58E-2	qkr58E-2	CG5821	-0.330239	6.40831e-12	-0.145666	0.0114512
FBgn0030680	-	CG8944	CG8944	0.888989	9.41625e-12	0.583656	6.4701e-05	x
FBgn0261245	singles bar	sing	CG13011	0.928821	1.19392e-10	0.413709	0.0180853
FBgn0004854	BarH2	B-H2	CG5488	-0.781048	2.34635e-10	-0.59182	1.23138e-05
FBgn0035678	-	CG10469	CG10469	1.03692	2.77509e-10	0.526836	0.0067331	x
FBgn0033421	-	CG1888	CG1888	-0.448796	3.42378e-10	-0.2415	0.00392494
FBgn0031279	-	CG3544	CG3544	-1.05078	1.48536e-09	-0.573384	0.00341466	x
FBgn0038826	Syncrip	Syp	CG17838	-0.777634	3.46005e-09	-0.55518	0.000157861	x
FBgn0032934	-	CG8679	CG8679	0.872249	3.84016e-09	-0.00993792	0.976085	x
FBgn0261859	-	CG42788	CG42788	-0.589199	5.36806e-09	-0.473956	2.00968e-05
FBgn0031327	-	CG5397	CG5397	-1.37157	6.01177e-09	-1.06758	3.86653e-05	x
FBgn0086779	steppke	step	CG11628	0.403444	8.1511e-09	0.227356	0.0053581	x
FBgn0261514	Nimrod A	NimA	CG42282	1.78696	8.99435e-09	1.21893	0.000467537
FBgn0039137	Ecdysteroid phosphate phosphatase	Epp	CG13604	1.03497	9.02831e-09	0.743668	0.000215031
FBgn0038662	Mitochondrial pyruvate carrier	Mpc1	CG14290	-0.80932	9.03666e-09	-0.634862	4.44868e-05
FBgn0286071	ADAM metallopeptidase with thrombospondin type 1 motif A	AdamTS-A	CG14869	-0.996314	9.07393e-09	-0.728945	0.00015652	x
FBgn0038419	-	CG14879	CG14879	1.19221	1.32738e-08	0.724396	0.00308571	x
FBgn0036373	Tondu-domain-containing Growth Inhibitor	Tgi	CG10741	0.350977	1.97205e-08	0.161235	0.0371303
FBgn0031530	Polypeptide N-Acetylgalactosaminyltransferase 2	Pgant2	CG3254	-0.549108	1.39656e-07	-0.41316	0.000384153
FBgn0000964	traffic jam	tj	CG10034	-0.477554	1.53847e-07	-0.146609	0.242174	x
FBgn0037939	-	CG14718	CG14718	2.09247	2.1077e-07	1.76599	6.38191e-05	x
FBgn0284222	-	CG46306	CG46306	0.402441	2.3242e-07	0.169058	0.0993285
FBgn0035049	Matrix metalloproteinase 1	Mmp1	CG4859	1.0396	2.84093e-07	0.538069	0.0274154
FBgn0004919	goliath	gol	CG2679	-0.791077	3.89169e-07	-0.695713	4.56664e-05
FBgn0045064	brain washing	bwa	CG13969	0.37858	4.51129e-07	0.26484	0.00198419	x
FBgn0011837	Tis11 zinc finger protein	Tis11	CG4070	0.634849	4.9432e-07	0.462425	0.00118454
FBgn0034224	insensible	insb	CG6520	2.25746	5.59654e-07	0.418015	0.555042
FBgn0034724	babos	babos	CG3624	-0.718187	5.73437e-07	-0.904053	2.50562e-09
FBgn0000463	Delta	Dl	CG3619	-0.666113	7.21018e-07	-0.467623	0.00221113	x
FBgn0261444	-	CG3638	CG3638	-0.612159	7.27126e-07	-0.44741	0.0013429	x
FBgn0010877	lethal (3) 05822	l(3)05822	CG7129	0.333543	8.05865e-07	0.221181	0.00455903	x
FBgn0037012	Reduction in Cnn dots 2	Rcd2	CG4786	0.673512	8.26691e-07	0.337936	0.0444316
FBgn0032388	-	CG6686	CG6686	0.387462	8.73899e-07	0.201521	0.0353543
FBgn0286204	ichor	ich	CG11966	2.08766	8.83815e-07	1.58423	0.000710273
FBgn0030309	-	CG1572	CG1572	0.770855	9.3218e-07	0.406393	0.0326834
FBgn0000358	Chorion protein 19	Cp19	CG6524	-1.91772	1.39714e-06	-1.57002	0.000344329
FBgn0266918	-	CG32486	CG32486	0.346527	1.74524e-06	0.356645	5.15457e-06	x
FBgn0003339	Sex combs reduced	Scr	CG1030	-0.625299	3.1783e-06	-0.266472	0.12134
FBgn0004837	Suppressor of Hairless	Su(H)	CG3497	0.565243	4.08182e-06	0.18613	0.275761	x
FBgn0015903	apontic	apt	CG5393	-0.384125	5.19364e-06	-0.205511	0.0454911
FBgn0035285	-	CG12025	CG12025	-0.325224	5.57203e-06	-0.227475	0.00562527	x
FBgn0259977	Tyrosine decarboxylase 1	Tdc1	CG30445	1.12133	8.75008e-06	0.92604	0.00093292	x
FBgn0033468	-	CG1418	CG1418	-0.407982	1.37998e-05	-0.240529	0.0342944
FBgn0262570	-	CG43110	CG43110	1.11811	1.91764e-05	0.392379	0.274676	x
FBgn0042135	Gdap2	Gdap2	CG18812	0.267566	2.14638e-05	0.178613	0.0152566
FBgn0036144	Glucuronyltransferase P	GlcAT-P	CG6207	-0.5605	2.73997e-05	-0.43042	0.00451321
FBgn0010313	corto	corto	CG2530	-0.519141	4.75786e-05	-0.236603	0.150191	x
FBgn0050291	-	CG30291	CG30291	-0.389885	6.24652e-05	-0.169103	0.184387	x
FBgn0003016	outspread	osp	CG3479	-0.423291	6.96842e-05	-0.163012	0.260007	x
FBgn0032600	Bub3 interacting GLEBS and Zinc finger domain protein	BuGZ	CG17912	-0.501668	7.05671e-05	-0.274765	0.0766013	x
FBgn0024234	glass bottom boat	gbb	CG5562	-0.39352	7.67674e-05	-0.263662	0.0246059	x
FBgn0262738	no receptor potential A	norpA	CG3620	-0.403235	8.25326e-05	-0.137283	0.342783	x
FBgn0265598	Beadex	Bx	CG44425	-0.318706	8.31218e-05	-0.154125	0.135129	x
FBgn0264693	ensconsin	ens	CG14998	0.249934	8.64867e-05	0.152868	0.0460459	x
FBgn0266486	-	CG45085	CG45085	0.428741	9.02293e-05	0.296877	0.0206896
FBgn0052495	Glutathione synthetase 2	Gss2	CG32495	0.764299	9.14952e-05	0.425665	0.0750423
FBgn0263396	squid	sqd	CG16901	-0.362873	0.000111475	-0.25671	0.0188877
FBgn0013576	mustard	mtd	CG32464	-0.418233	0.00013545	-0.248603	0.0618263	x
FBgn0004861	polyhomeotic proximal	ph-p	CG18412	-0.358988	0.000157603	-0.210362	0.0695176	x
FBgn0261648	spalt major	salm	CG6464	-0.316309	0.000182719	-0.057941	0.688681	x
FBgn0052121	-	CG32121	CG32121	0.57434	0.000190307	0.323039	0.0884973	x
FBgn0003944	Ultrabithorax	Ubx	CG10388	0.803666	0.000194499	0.541997	0.0331551
FBgn0035241	-	CG12105	CG12105	0.710253	0.000202355	0.185692	0.528784
FBgn0000179	bifid	bi	CG3578	-0.334588	0.000203368	-0.220972	0.0386766
FBgn0038818	Neprilysin 4	Nep4	CG4058	-0.704615	0.000206292	-0.469547	0.0366634	x
FBgn0030520	Programmed cell death 4	Pdcd4	CG10990	0.251685	0.000260511	0.371537	2.2429e-07	x
FBgn0283499	Insulin-like receptor	InR	CG18402	1.23875	0.000288644	1.06388	0.0050204
FBgn0032378	Cyclin Y	CycY	CG14939	-0.171246	0.000313768	-0.0848616	0.165771
FBgn0030642	-	CG15642	CG15642	0.47498	0.000323274	0.295524	0.0656261	x
FBgn0015919	caupolican	caup	CG10605	-0.435138	0.000342213	-0.169648	0.311217
FBgn0016694	PAR-domain protein 1	Pdp1	CG17888	-0.512709	0.000447175	-0.457611	0.00499811	x
FBgn0035719	target of wingless	tow	CG14821	0.29983	0.00053325	0.13455	0.244506	x
FBgn0038638	-	CG7702	CG7702	1.16923	0.000545154	0.577712	0.181583
FBgn0052694	-	CG32694	CG32694	0.7046	0.000600683	0.58995	0.0111627
FBgn0000541	Enhancer of bithorax	E(bx)	CG32346	-0.321595	0.000719295	-0.226968	0.0434385
FBgn0031945	-	CG7191	CG7191	0.398797	0.000800813	0.444026	0.000591482	x
FBgn0262508	-	CG43078	CG43078	-0.353665	0.000916024	-0.29726	0.0143752
FBgn0032479	-	CG16974	CG16974	-0.205002	0.000930951	-0.0659203	0.472069	x
FBgn0261552	pasilla	ps	CG42670	-0.385076	0.00101566	-0.216088	0.14212	x
FBgn0051287	-	CG31287	CG31287	0.667599	0.00138231	0.00140394	0.998004	x
FBgn0020647	Krueppel target at 95D	KrT95D	CG5405	0.234111	0.00152011	0.113278	0.246672
FBgn0001250	inflated	if	CG9623	-0.306095	0.00170322	-0.169853	0.170162
FBgn0004635	rhomboid	rho	CG1004	0.535752	0.00218955	0.134555	0.633838	x
FBgn0033252	-	CG12769	CG12769	-0.249323	0.00230414	-0.193879	0.0422657
FBgn0267033	maternal gene required for meiosis	mamo	CG45477	-0.37309	0.00251222	-0.36221	0.00822467	x
FBgn0040759	-	CG13177	CG13177	1.34599	0.002779	0.695081	0.221617	x
FBgn0011582	Dopamine 1-like receptor 1	Dop1R1	CG9652	-0.435452	0.00310966	-0.319533	0.0671822
FBgn0040336	Seipin	Seipin	CG9904	0.487871	0.00336605	0.367033	0.0623079	x
FBgn0035948	-	CG5644	CG5644	0.693573	0.0034914	0.385732	0.204128
FBgn0034612	-	CG10505	CG10505	0.783383	0.00350984	0.419275	0.227716
FBgn0263102	pipsqueak	psq	CG2368	-0.322199	0.00350984	-0.171219	0.232635
FBgn0266487	-	CG45086	CG45086	-0.245137	0.00374669	0.0174817	0.923867	x
FBgn0031468	-	CG2975	CG2975	1.01145	0.00396209	0.957605	0.0140356
FBgn0085387	shaking B	shakB	CG34358	-0.61851	0.00419405	-0.337055	0.225864
FBgn0003068	period	per	CG2647	-0.68415	0.00473286	-0.685942	0.0102495	x
FBgn0264562	Hormone receptor 4	Hr4	CG43934	0.440413	0.00497506	0.0304379	0.927809	x
FBgn0031602	-	CG15431	CG15431	-0.254952	0.00506176	-0.185767	0.0870096
FBgn0003165	pumilio	pum	CG9755	-0.284651	0.00529326	-0.138602	0.311411	x
FBgn0036621	roquin	roq	CG16807	-0.190959	0.00568909	-0.136889	0.0992316	x
FBgn0284226	-	CG46310	CG46310	0.814477	0.00601121	0.153651	0.772525	x
FBgn0038683	-	CG11779	CG11779	-0.216718	0.00674592	-0.0407263	0.776472
FBgn0040089	meso18E	meso18E	CG14233	-0.313861	0.00706713	-0.385482	0.00203754	x
FBgn0036994	-	CG5199	CG5199	0.269566	0.00794858	0.22402	0.0618836	x
FBgn0002985	odd skipped	odd	CG3851	-0.456479	0.00795018	-0.252064	0.260834
FBgn0015513	myoblast city	mbc	CG10379	-0.326977	0.00819434	-0.387832	0.00358637	x
FBgn0036259	-	CG9760	CG9760	-0.61019	0.0083569	-0.660696	0.00868701	x
FBgn0037231	Vacuolar protein sorting 24	Vps24	CG9779	0.154873	0.00852468	0.0552558	0.526242	x
FBgn0261985	Protein tyrosine phosphatase Meg	Ptpmeg	CG1228	0.191834	0.00934277	0.121372	0.190716
FBgn0286516	aaquetzalli	aqz	CG9821	0.277657	0.00958607	0.138735	0.336235
FBgn0050115	Guanine nucleotide exchange factor in mesoderm	GEFmeso	CG30115	0.280788	0.0096314	0.124548	0.410587
FBgn0035238	-	CG12104	CG12104	0.32355	0.0100109	0.266253	0.0705055
FBgn0003117	pannier	pnr	CG3978	-0.502002	0.0107594	-0.467842	0.0363642
FBgn0000339	cornichon	cni	CG5855	0.211556	0.0110474	0.131092	0.214716	x
FBgn0261243	Puromycin sensitive aminopeptidase	Psa	CG1009	-0.262288	0.0130344	-0.0876348	0.584021
FBgn0034435	wurstfest	fest	CG9975	1.10351	0.0141465	0.69507	0.209485	x
FBgn0261610	-	CG42699	CG42699	0.187855	0.0148608	0.177977	0.0427674
FBgn0037856	Leash	Leash	CG4674	0.232809	0.0154802	0.116326	0.37626
FBgn0039852	nyobe	nyo	CG1499	-1.06312	0.0159092	-0.34519	0.60535
FBgn0259785	putzig	pzg	CG7752	-0.188975	0.0166053	-0.0846997	0.444872	x
FBgn0016070	smaug	smg	CG5263	-0.295379	0.0169838	-0.162929	0.318853	x
FBgn0266084	Formin homology 2 domain containing	Fhos	CG42610	-0.328012	0.0169838	-0.186808	0.297748	x
FBgn0033368	-	CG13743	CG13743	-0.206777	0.0180294	-0.113073	0.329231	x
FBgn0263220	Hyperkinetic	Hk	CG43388	-0.263261	0.0183519	-0.252621	0.0463596	x
FBgn0264490	Ecdysone-induced protein 93F	Eip93F	CG18389	-0.271348	0.0194643	-0.279504	0.0315011	x
FBgn0034817	Arginine methyltransferase 7	Art7	CG9882	-0.186177	0.0197362	-0.021524	0.895002	x
FBgn0004401	Protein on ecdysone puffs	Pep	CG6143	0.157502	0.020231	0.195335	0.00737883	x
FBgn0031060	Threonyl-carbamoyl synthesis 4	Tcs4	CG14231	0.242894	0.0220604	0.10134	0.507064
FBgn0266756	bitesize	btsz	CG44012	-0.189525	0.0227054	-0.214191	0.0189722
FBgn0039738	Mannosyl (alpha-1,6-)-glycoprotein beta-1,2-N-acetylglucosaminyltransferase	Mgat2	CG7921	-0.239835	0.026141	-0.0871782	0.590879	x
FBgn0034530	Reduction in Cnn dots 6	Rcd6	CG11175	0.378655	0.0273394	0.26119	0.226831	x
FBgn0030634	-	CG9164	CG9164	-0.187867	0.0291502	-0.161249	0.111443
FBgn0051719	RluA pseudouridine synthase 1	RluA-1	CG31719	0.232448	0.0298285	0.0814008	0.620839	x
FBgn0027101	Dual-specificity tyrosine phosphorylation-regulated kinase 3	Dyrk3	CG40478	-0.229452	0.0300699	-0.230319	0.0545927
FBgn0031044	MAPK Phosphatase 4	MKP-4	CG14211	0.151665	0.031656	0.19971	0.00790092	x
FBgn0010622	Dynactin 3, p24 subunit	DCTN3-p24	CG9893	-0.23525	0.0343379	-0.252197	0.0432186
FBgn0086674	Tyrosylprotein sulfotransferase	Tpst	CG32632	0.152146	0.0345989	0.160889	0.0463161	x
FBgn0041605	complexin	cpx	CG32490	-0.218104	0.0348148	-0.0717035	0.659409
FBgn0259938	clockwork orange	cwo	CG17100	-0.250729	0.0351415	-0.446686	0.000202754	x
FBgn0033413	preli-like	prel	CG8806	0.344185	0.0384342	0.328452	0.0844405	x
FBgn0016059	Semaphorin 1b	Sema1b	CG6446	-0.189952	0.0422016	-0.195805	0.0642408
FBgn0027499	windei	wde	CG12340	-0.171985	0.0437776	-0.152819	0.126839	x
FBgn0032593	Transient receptor potential cation channel gamma	Trpgamma	CG5996	0.439304	0.0444704	0.0844056	0.831554	x
FBgn0262509	neuromusculin	nrm	CG43079	-0.370367	0.0448555	-0.206453	0.404466
FBgn0002592	Enhancer of split m2, Bearded family member	E(spl)m2-BFM	CG6104	-0.456711	0.0453147	-0.531765	0.0351918	x
FBgn0036202	-	CG6024	CG6024	-0.198182	0.0456263	-0.105483	0.435676	x
FBgn0038286	-	CG6966	CG6966	0.135694	0.0473768	0.00885458	0.950402	x
FBgn0004860	polyhomeotic distal	ph-d	CG3895	-0.232268	0.0503295	-0.141647	0.365542
FBgn0039688	Kuzbanian-like	Kul	CG1964	-0.257075	0.0529948	0.00943308	0.972134	x
FBgn0025336	-	CG4882	CG4882	-0.162311	0.0538032	-0.079752	0.499065
FBgn0035812	-	CG7457	CG7457	0.388965	0.0542954	0.298991	0.228294	x
FBgn0032856	-	CG16798	CG16798	-0.481035	0.0564468	0.171688	0.65988
FBgn0030467	-	CG1764	CG1764	-0.167433	0.0567735	-0.136096	0.205192
FBgn0030346	BLOC-1 related complex subunit 5	BORCS5	CG11802	0.178406	0.0641629	0.188388	0.0838595	x
FBgn0033426	5' nucleotidase C	Nt5c	CG1814	0.156816	0.07013	0.114193	0.293565
FBgn0001624	discs large 1	dlg1	CG1725	-0.135739	0.072223	-0.0142679	0.925618
FBgn0004198	cut	ct	CG11387	-0.221276	0.0724921	-0.178918	0.233691	x
FBgn0030067	RNA-binding motif protein 13	Rbm13	CG10648	0.261648	0.0756091	0.165353	0.394741	x
FBgn0002031	lethal (2) 37Cc	l(2)37Cc	CG10691	-0.156544	0.0786233	-0.117402	0.291235
FBgn0264495	grappa	gpp	CG42803	-0.202806	0.0805019	-0.0875667	0.608723	x
FBgn0028999	nervous fingers 1	nerfin-1	CG13906	0.522142	0.086436	0.177484	0.72463	x
FBgn0019662	quemao	qm	CG8593	0.128753	0.0876835	0.166456	0.0412821
FBgn0263353	-	CG11000	CG11000	-0.303651	0.0885343	-0.0705459	0.821409
FBgn0032780	-	CG13085	CG13085	-0.347641	0.0893145	-0.282324	0.263947	x
FBgn0035488	-	CG11593	CG11593	0.123188	0.0938442	0.088705	0.34444	x
FBgn0259150	Otopetrin-like c	OtopLc	CG42265	-0.19919	0.0960825	-0.0820679	0.648368
FBgn0261988	G protein-coupled receptor kinase 2	Gprk2	CG17998	-0.281525	0.0965052	-0.158639	0.491746	x
FBgn0016061	sidestep	side	CG31062	-0.19794	0.09732	-0.0945912	0.578905	x
FBgn0026319	TNF-receptor-associated factor 4	Traf4	CG3048	0.350364	0.101277	0.106089	0.764849	x
FBgn0036830	Cytochrome c oxidase subunit 6A-like 2	COX6AL2	CG14077	0.364968	0.10396	0.017811	0.968335
FBgn0001122	G protein alpha o subunit	Galphao	CG2204	-0.180102	0.10435	-0.106321	0.477276
FBgn0040382	-	CG5273	CG5273	-0.124185	0.105047	0.0569849	0.610307	x
FBgn0036829	Ionotropic receptor 75d	Ir75d	CG14076	0.461728	0.109347	0.401407	0.27075
FBgn0011659	Mlh1	Mlh1	CG11482	0.257796	0.113754	0.30886	0.0938518
FBgn0027584	-	CG4757	CG4757	-0.749659	0.115243	-0.866398	0.0932659
FBgn0025777	homer	homer	CG11324	-0.250081	0.117981	0.0248958	0.937427	x
FBgn0031281	SAGA factor-like TAF6	Saf6	CG3883	-0.126318	0.118193	0.0383417	0.777789
FBgn0030049	Topoisomerase related function 4-1	Trf4-1	CG11265	-0.128166	0.119606	-0.074999	0.502406
FBgn0020414	Imaginal disc growth factor 3	Idgf3	CG4559	0.302632	0.121567	0.18391	0.481859	x
FBgn0038395	-	CG10407	CG10407	0.316571	0.122271	0.132381	0.666832
FBgn0035229	pinstripe	pns	CG7852	0.115203	0.124307	0.126829	0.134129
FBgn0261090	Synaptotagmin beta	Sytbeta	CG42333	0.147426	0.129105	0.0908109	0.485318
FBgn0016976	stoned A	stnA	CG12500	-0.194319	0.133887	-0.090029	0.635171
FBgn0030863	-	CG8188	CG8188	-0.14995	0.1345	-0.0713588	0.625182	x
FBgn0263603	Zinc-finger protein at 72D	Zn72D	CG5215	0.0957756	0.134902	0.0647468	0.439698	x
FBgn0036522	Phaser	Phs	CG7372	0.267938	0.13976	0.0287658	0.936148
FBgn0029823	Serine hydroxymethyl transferase	Shmt	CG3011	0.453891	0.140461	0.507131	0.141646
FBgn0039742	-	CG15528	CG15528	-0.374647	0.144614	-0.108988	0.800165
FBgn0013987	MAP kinase activated protein-kinase-2	MAPk-Ak2	CG3086	0.097091	0.148165	0.0314862	0.775635	x
FBgn0016641	Protein tyrosine phosphatase-ERK/Enhancer of Ras1	PTP-ER	CG9856	-0.113245	0.152852	0.0168284	0.91205
FBgn0263352	Upstream of N-ras	Unr	CG7015	-0.169957	0.152917	-0.160404	0.257644
FBgn0265276	lethal (3) neo38	l(3)neo38	CG6930	-0.179272	0.153767	-0.120001	0.468217	x
FBgn0002932	neuralized	neur	CG11988	-0.173239	0.158163	-0.200602	0.147304	x
FBgn0260748	-	CG5004	CG5004	0.243586	0.161182	-0.00477666	0.988758	x
FBgn0030997	-	CG7990	CG7990	-0.126249	0.16284	0.0237693	0.887602
FBgn0263968	no-on-and-no-off transient C	nonC	CG32743	0.116796	0.163488	0.108374	0.281359
FBgn0036897	Ring finger protein 146	Rnf146	CG8786	-0.123551	0.165679	-0.043482	0.762191
FBgn0263996	-	CG43739	CG43739	0.192061	0.167208	0.120153	0.521335	x
FBgn0037612	-	CG8112	CG8112	0.3464	0.170649	0.49974	0.0617768
FBgn0262739	Argonaute-1	AGO1	CG6671	-0.150532	0.173093	-0.0961629	0.515624
FBgn0259151	-	CG42266	CG42266	0.614268	0.178894	0.0256494	0.976085	x
FBgn0027872	rdgBbeta	rdgBbeta	CG17818	0.114704	0.186081	0.0662008	0.580643
FBgn0026086	Adenosine deaminase acting on RNA	Adar	CG12598	-0.142928	0.187607	-0.128027	0.330937
FBgn0266848	wings apart	wap	CG14614	-0.116829	0.18963	-0.0512179	0.703114	x
FBgn0015229	gliolectin	glec	CG6575	0.176186	0.194889	0.0250971	0.923676	x
FBgn0036844	Mitogen-activated protein kinase phosphatase 3	Mkp3	CG14080	0.250059	0.198707	0.0481663	0.892479
FBgn0261854	atypical protein kinase C	aPKC	CG42783	-0.167577	0.199457	-0.186986	0.210307
FBgn0000024	Acetylcholine esterase	Ace	CG17907	-0.210057	0.201515	-0.0887818	0.723481	x
FBgn0027280	orion	orion	CG2206	0.163164	0.20492	0.115638	0.490759	x
FBgn0036659	-	CG9701	CG9701	0.31754	0.206006	0.379476	0.175751
FBgn0028370	kekkon 3	kek3	CG4192	-0.121434	0.207547	-0.110594	0.34444
FBgn0086361	alphabet	alph	CG1906	-0.106457	0.208543	-0.0379107	0.781658	x
FBgn0038223	Aftiphilin	Afti	CG8538	-0.110203	0.214572	-0.0949004	0.3872	x
FBgn0032485	-	CG9426	CG9426	-0.0829476	0.214963	-0.0172108	0.887905	x
FBgn0265042	Inwardly rectifying potassium channel 1	Irk1	CG44159	0.235341	0.21758	-0.183493	0.450705	x
FBgn0013467	igloo	igl	CG18285	-0.127622	0.219969	-0.122344	0.326312
FBgn0039431	plum	plum	CG6490	0.135902	0.230061	0.0510003	0.778224	x
FBgn0015396	jumeau	jumu	CG4029	0.217864	0.234907	0.111369	0.674458
FBgn0285944	paralytic	para	CG9907	-0.226626	0.235356	-0.252399	0.250592
FBgn0023545	Phosphatidylinositol glycan anchor biosynthesis class K	PIG-K	CG4406	-0.0975322	0.238276	0.0467823	0.703522	x
FBgn0086677	jelly belly	jeb	CG30040	0.214075	0.2388	0.030008	0.930052
FBgn0029896	-	CG3168	CG3168	0.154871	0.239772	0.129495	0.433031
FBgn0050419	-	CG30419	CG30419	-0.131927	0.240349	-0.106718	0.453208
FBgn0259994	Otopetrin-like a	OtopLa	CG42492	-0.139955	0.240392	0.0932052	0.556869	x
FBgn0013432	bcn92	bcn92	CG3717	0.141183	0.245846	0.0458574	0.818831
FBgn0030174	-	CG15312	CG15312	0.160052	0.247227	0.164959	0.311411
FBgn0260400	embryonic lethal abnormal vision	elav	CG4262	-0.168877	0.250509	-0.108242	0.585452
FBgn0259221	ATPase 8A	ATP8A	CG42321	-0.105594	0.250566	0.016613	0.923828	x
FBgn0002633	Enhancer of split m7, helix-loop-helix	E(spl)m7-HLH	CG8361	0.463862	0.257381	0.0560949	0.943743
FBgn0037884	Arfaptin	Arfip	CG17184	0.0528186	0.263638	0.0965472	0.0463596
FBgn0005677	dachshund	dac	CG4952	-0.116812	0.266533	-0.121372	0.32804
FBgn0004244	Resistant to dieldrin	Rdl	CG10537	-0.192963	0.268529	-0.229516	0.246544	x
FBgn0031081	Neprilysin 3	Nep3	CG9565	-0.0965673	0.276336	-0.0068803	0.96672	x
FBgn0051038	-	CG31038	CG31038	-0.103639	0.276828	0.012861	0.94327	x
FBgn0035625	Blimp-1	Blimp-1	CG5249	-0.116642	0.280527	-0.00493642	0.979658
FBgn0259145	-	CG42260	CG42260	-0.170518	0.284681	-0.232539	0.181272	x
FBgn0038839	Kctd12-like	Ktl	CG10830	-0.105011	0.2909	-0.0472474	0.756032	x
FBgn0032726	-	CG10621	CG10621	-0.407282	0.292574	-0.301774	0.543264	x
FBgn0039945	-	CG17159	CG17159	0.1259	0.292812	0.0852394	0.596206	x
FBgn0003870	tramtrack	ttk	CG1856	-0.0857814	0.293052	-0.0674007	0.520258
FBgn0031516	-	CG9663	CG9663	-0.120946	0.295082	-0.136028	0.312232	x
FBgn0051122	-	CG31122	CG31122	-0.0625551	0.295421	-0.0253586	0.789	x
FBgn0085423	GRAM domain containing 1B	GramD1B	CG34394	0.114834	0.29873	0.136904	0.277575	x
FBgn0032901	skywalker	sky	CG9339	0.102041	0.300801	0.0560652	0.693913
FBgn0266525	-	CG45092	CG45092	0.575856	0.302402	#N/A	#N/A
FBgn0039942	-	CG17163	CG17163	-0.108605	0.302899	-0.158935	0.162356
FBgn0262483	RIM-binding protein	Rbp	CG43073	-0.147573	0.309427	-0.0803809	0.701763	x
FBgn0264552	-	CG43931	CG43931	-0.547331	0.309623	-0.292129	0.691615	x
FBgn0262114	Ran-binding protein M	RanBPM	CG42236	0.0644934	0.314656	0.128308	0.0446507	x
FBgn0039889	ADP ribosylation factor-like 4	Arl4	CG2219	-0.0990157	0.315679	-0.134452	0.216474
FBgn0261837	-	pre-mod(mdg4)-T	CG42769	-0.164111	0.317255	-0.15967	0.421206	x
FBgn0004880	scratch	scrt	CG1130	-0.159164	0.317724	-0.0736147	0.761397	x
FBgn0039356	-	CG5039	CG5039	-0.269555	0.317885	-0.193019	0.593288	x
FBgn0031100	-	CG1504	CG1504	-0.165352	0.323974	0.000586331	0.998564	x
FBgn0259162	Runt related B	RunxB	CG42267	0.136649	0.325934	-0.0602743	0.779562
FBgn0003326	scabrous	sca	CG17579	-0.123744	0.32638	-0.00149078	0.995088
FBgn0001108	Dynactin 1, p150 subunit	DCTN1-p150	CG9206	-0.0875592	0.32806	-0.0780402	0.485245	x
FBgn0029746	-	CG15465	CG15465	-0.153838	0.328614	-0.0427039	0.87473	x
FBgn0003997	head involution defective	hid	CG5123	-0.140721	0.349005	-0.253602	0.098847	x
FBgn0015609	Cadherin-N	CadN	CG7100	-0.163123	0.353445	-0.0770198	0.773527	x
FBgn0032341	RALBP1 associated Eps domain containing	Reps	CG6192	-0.0642722	0.362333	0.00711645	0.956316	x
FBgn0262816	-	CG43187	CG43187	0.500767	0.364562	0.168023	0.843999
FBgn0004516	Glutamic acid decarboxylase 1	Gad1	CG14994	-0.107695	0.365512	-0.0133238	0.951442
FBgn0259246	bruchpilot	brp	CG42344	-0.140571	0.366214	-0.0882405	0.685389	x
FBgn0032476	-	CG5439	CG5439	0.0667732	0.367031	0.130924	0.0793365	x
FBgn0260658	-	CG42541	CG42541	0.169323	0.367385	0.163575	0.476547
FBgn0027508	tankyrase	Tnks	CG4719	0.0928688	0.380108	0.102809	0.410587
FBgn0003710	temperature-induced paralytic E	tipE	CG1232	-0.123139	0.381167	-0.0932401	0.616644
FBgn0013973	Guanylyl cyclase beta-subunit at 100B	Gycbeta100B	CG1470	-0.114658	0.387389	-0.102717	0.535311	x
FBgn0259171	Phosphodiesterase 9	Pde9	CG42276	-0.107324	0.396245	-0.0389296	0.850393	x
FBgn0283649	early girl	elgi	CG17033	0.0660413	0.397126	0.081577	0.365809	x
FBgn0040505	Anaplastic lymphoma kinase	Alk	CG8250	-0.104485	0.403567	-0.0755825	0.654197
FBgn0085447	still life	sif	CG34418	-0.152204	0.404747	-0.0984412	0.699266	x
FBgn0030670	Phosphatidylinositol synthase	Pis	CG9245	0.0945608	0.414067	0.161255	0.182323	x
FBgn0034266	-	CG4975	CG4975	0.134136	0.426288	0.0592252	0.820743
FBgn0263776	-	CG43693	CG43693	0.190476	0.426528	0.0387993	0.927
FBgn0034232	-	CG4866	CG4866	-0.147499	0.427182	-0.0665861	0.815299
FBgn0052506	trabuco	tbc	CG32506	0.115092	0.437791	0.0994147	0.601238	x
FBgn0083963	Neuroligin 3	Nlg3	CG34127	-0.0923811	0.443317	-0.0523824	0.766605
FBgn0038787	-	CG4360	CG4360	-0.0412519	0.445675	-0.0335635	0.638729	x
FBgn0004896	forkhead domain 59A	fd59A	CG3668	-0.111127	0.445763	-0.172518	0.271556	x
FBgn0030809	Ubr1 ubiquitin ligase	Ubr1	CG9086	-0.0856599	0.471029	-0.00519297	0.979309	x
FBgn0011836	TBP-associated factor 2	Taf2	CG6711	-0.0727021	0.471974	0.0371439	0.808183	x
FBgn0034160	-	CG5550	CG5550	0.253141	0.478249	-0.518507	0.14566
FBgn0013759	CASK	CASK	CG6703	-0.0812836	0.482329	-0.0166397	0.933881
FBgn0267001	Tenascin accessory	Ten-a	CG42338	-0.0974064	0.484368	-0.0579309	0.774339	x
FBgn0034978	-	CG3257	CG3257	0.0752451	0.485964	0.156675	0.145594	x
FBgn0263392	Ten-Eleven Translocation (TET) family protein	Tet	CG43444	-0.112075	0.48706	-0.105519	0.603652
FBgn0261612	Cyclic nucleotide-gated ion channel subunit A	CngA	CG42701	-0.120916	0.490639	-0.172858	0.37734	x
FBgn0032895	target of wit	twit	CG9335	-0.0980468	0.490926	-0.115194	0.492512	x
FBgn0037657	hyrax	hyx	CG11990	0.0443477	0.494668	0.0827106	0.219982	x
FBgn0020513	PAICS bifunctional enzyme	Paics	CG3989	0.183728	0.497846	-0.173303	0.610853
FBgn0064123	stargazin-like protein	stg1	CG33670	0.109933	0.501687	0.0211999	0.94007
FBgn0010473	turtle	tutl	CG15427	-0.211368	0.504562	-0.171259	0.681195
FBgn0037326	-	CG14669	CG14669	-0.0919765	0.507906	-0.0704287	0.706359	x
FBgn0034267	-	CG4984	CG4984	0.155125	0.512336	0.000433166	0.998927	x
FBgn0050005	Glutathione S transferase T2	GstT2	CG30005	0.330441	0.512729	0.264148	0.688897
FBgn0265778	PDZ domain-containing guanine nucleotide exchange factor	PDZ-GEF	CG9491	-0.0870729	0.514481	-0.013029	0.954843
FBgn0263131	-	CG43373	CG43373	0.0843148	0.520905	0.118391	0.421531	x
FBgn0004852	Adenylyl cyclase 76E	Ac76E	CG7978	0.0802541	0.52833	-0.029414	0.88702
FBgn0031904	-	CG5149	CG5149	0.0480155	0.532325	-0.0656369	0.452375
FBgn0261641	-	CG42724	CG42724	-0.0872631	0.546572	-0.106357	0.52999
FBgn0010105	commissureless	comm	CG17943	-0.0566278	0.546659	0.0434626	0.73469	x
FBgn0026206	meiotic P26	mei-P26	CG12218	-0.128092	0.551589	-0.125336	0.643385
FBgn0035481	-	CG12605	CG12605	-0.0842784	0.559535	0.00701993	0.976085	x
FBgn0016977	split ends	spen	CG18497	-0.124535	0.56484	-0.0949246	0.748405
FBgn0031434	insensitive	insv	CG3227	0.192483	0.566082	-0.0735951	0.889895	x
FBgn0000479	dunce	dnc	CG32498	0.0728637	0.571021	-0.0193468	0.927809
FBgn0285926	IGF-II mRNA-binding protein	Imp	CG1691	-0.0957477	0.580276	-0.154506	0.412301
FBgn0053547	Rab3 interacting molecule	Rim	CG33547	-0.0964553	0.580403	-0.0648656	0.793482	x
FBgn0031952	cell division cycle 14	cdc14	CG7134	0.0375243	0.588248	0.0108594	0.924583	x
FBgn0035246	-	CG13928	CG13928	0.0623103	0.594598	0.210487	0.0431971
FBgn0032230	lowfat	lft	CG13139	-0.0843367	0.602984	-0.199956	0.209051
FBgn0085434	Na channel protein 60E	NaCP60E	CG34405	-0.10871	0.604188	-0.0959545	0.727237	x
FBgn0041775	trailer hitch	tral	CG10686	-0.031275	0.609812	0.022676	0.791827	x
FBgn0034723	-	CG13506	CG13506	0.0531048	0.61266	0.00503607	0.976085
FBgn0037766	tipE homolog 1	Teh1	CG12806	-0.0733099	0.621955	-0.120194	0.459946
FBgn0032042	-	CG13398	CG13398	0.0582202	0.626704	0.0954817	0.466644	x
FBgn0083962	-	CG34126	CG34126	0.0597928	0.627347	0.11194	0.388109
FBgn0052676	stuxnet	stx	CG32676	0.0496064	0.627557	0.0869111	0.42918
FBgn0001987	Gliotactin	Gli	CG3903	0.134425	0.633852	0.0537406	0.903815
FBgn0085371	-	CG34342	CG34342	0.169807	0.649439	0.06565	0.912371
FBgn0265632	-	CG44439	CG44439	0.289586	0.651464	-0.053925	0.957174
FBgn0032850	Kua	Kua	CG10723	0.113778	0.653412	0.166547	0.558304
FBgn0033058	CCHamide-2 receptor	CCHa2-R	CG14593	-0.0826416	0.658992	0.12837	0.537849
FBgn0011206	boule	bol	CG4760	-0.0853378	0.659005	-0.169176	0.401073
FBgn0011817	nemo	nmo	CG7892	-0.0640613	0.663057	-0.0663003	0.722741	x
FBgn0284236	-	CG46320	CG46320	-0.202077	0.664983	0.447666	0.33603	x
FBgn0003499	stripe	sr	CG7847	0.149724	0.672555	-0.103366	0.835434
FBgn0002734	Enhancer of split mdelta, helix-loop-helix	E(spl)mdelta-HLH	CG8328	0.223118	0.673949	#N/A	#N/A
FBgn0259108	futsch	futsch	CG34387	-0.0843064	0.680608	-0.0532367	0.857429
FBgn0259243	Protein kinase, cAMP-dependent, regulatory subunit type 1	Pka-R1	CG42341	-0.0468495	0.685265	-0.104719	0.371798	x
FBgn0284231	-	CG46315	CG46315	-0.260339	0.687575	-0.234816	0.782032	x
FBgn0029864	-	CG15894	CG15894	-0.0629645	0.690133	-0.0310665	0.896842	x
FBgn0052699	Lysophosphatidylcholine acyltransferase	LPCAT	CG32699	0.0439263	0.691743	-0.0693909	0.575809	x
FBgn0028979	tiptop	tio	CG12630	-0.0476166	0.695259	0.0413498	0.800165
FBgn0038089	davis-cup	d-cup	CG14387	-0.250973	0.696361	0.043358	0.96385
FBgn0264005	H6-like-homeobox	Hmx	CG43748	-0.0714744	0.701093	0.0222604	0.938977
FBgn0011666	musashi	msi	CG5099	-0.105288	0.710013	-0.0528786	0.900772
FBgn0040068	Vav guanine nucleotide exchange factor	Vav	CG7893	0.0479352	0.710806	0.0678241	0.653956	x
FBgn0052791	Dpr-interacting protein alpha	DIP-alpha	CG32791	-0.0837941	0.721546	-0.00365038	0.991546
FBgn0029663	-	CG10804	CG10804	0.0403692	0.721548	-0.00181833	0.991546	x
FBgn0260442	rhea	rhea	CG6831	0.0503455	0.72156	0.0128426	0.953222
FBgn0004575	Synapsin	Syn	CG3985	-0.0587599	0.733073	0.0140029	0.957924
FBgn0262733	Src oncogene at 64B	Src64B	CG7524	0.0435037	0.735202	0.0593195	0.699844
FBgn0037016	-	CG13252	CG13252	0.058986	0.737227	-0.0870402	0.673713
FBgn0083978	-	CG17672	CG17672	0.192653	0.741132	-0.507379	0.367416
FBgn0039519	Cytochrome P450 6a18	Cyp6a18	CG13977	-0.220381	0.748266	0.506646	0.450736
FBgn0000120	Arrestin 1	Arr1	CG5711	-0.0574779	0.748356	0.000633998	0.99827
FBgn0022382	Protein kinase, cAMP-dependent, regulatory subunit type 2	Pka-R2	CG15862	-0.0433843	0.760781	-0.0756432	0.633172
FBgn0051975	-	CG31975	CG31975	0.212623	0.761801	0.265994	0.748418	x
FBgn0039590	-	CG10011	CG10011	-0.0527833	0.762757	0.0676326	0.752442
FBgn0039640	Suppressor of ER stress-induced death	superdeath	CG14516	-0.0747721	0.764807	-0.468186	0.0161954
FBgn0034032	-	CG8195	CG8195	0.0284465	0.773317	0.0791486	0.409531	x
FBgn0039039	lame duck	lmd	CG4677	0.176781	0.777406	0.0416524	0.96385
FBgn0260971	-	CG42594	CG42594	-0.0476454	0.777541	-0.0452765	0.838038
FBgn0035947	Signal recognition particle 68	Srp68	CG5064	-0.0361427	0.778108	0.0696437	0.617457	x
FBgn0003507	serpent	srp	CG3992	0.125375	0.778836	0.294402	0.514026
FBgn0038617	WD repeat domain 37	Wdr37	CG12333	0.0350738	0.787596	0.0682423	0.630941
FBgn0266438	Phosphatidylinositol glycan anchor biosynthesis class Z	PIG-Z	CG45068	-0.0420672	0.787947	-0.00985459	0.965981
FBgn0283724	Girdin	Girdin	CG12734	-0.0321731	0.789811	0.0299643	0.852212	x
FBgn0267728	off-track2	otk2	CG8964	0.0639043	0.790467	0.0181949	0.959181
FBgn0036544	sugar-free frosting	sff	CG6114	0.038152	0.79197	0.107692	0.44291
FBgn0259927	-	CG42450	CG42450	0.0658693	0.795857	-0.0134262	0.97091
FBgn0029887	-	CG3198	CG3198	0.0334886	0.798587	0.121863	0.307568
FBgn0039883	Rho GTPase activating protein at 100F	RhoGAP100F	CG1976	-0.0570287	0.799193	-0.117478	0.629466
FBgn0035142	Homeodomain interacting protein kinase	Hipk	CG17090	-0.0345742	0.802435	0.00887764	0.965194	x
FBgn0266540	-	CG45101	CG45101	-0.0367515	0.804243	0.0645792	0.70241
FBgn0053526	Phosphatase 1 nuclear targeting subunit	PNUTS	CG33526	0.041725	0.804282	0.0185148	0.94007
FBgn0036154	-	CG6168	CG6168	-0.153361	0.812042	#N/A	#N/A
FBgn0260486	Zizimin	Ziz	CG42533	0.0363649	0.812042	0.095618	0.533224
FBgn0035945	-	CG5026	CG5026	-0.0235411	0.812926	0.0248818	0.849633
FBgn0052767	-	CG32767	CG32767	-0.0403118	0.814433	-0.0298643	0.900772
FBgn0051774	friend of echinoid	fred	CG31774	-0.0377417	0.814845	0.100732	0.531202	x
FBgn0001319	knot	kn	CG10197	-0.0369624	0.814965	-0.0709154	0.687248
FBgn0052651	-	CG32651	CG32651	0.167523	0.816182	0.0864668	0.931358	x
FBgn0034803	-	CG9849	CG9849	-0.0297539	0.817317	-0.0402033	0.802801
FBgn0263117	-	CG34377	CG34377	0.0823031	0.821585	-0.322854	0.32804	x
FBgn0030960	Autophagy-related 101	Atg101	CG7053	0.0280196	0.831022	0.019237	0.916622
FBgn0035720	-	CG10077	CG10077	-0.0396233	0.831952	0.0794728	0.701719
FBgn0259789	zelda	zld	CG12701	-0.0591024	0.83222	-0.107669	0.734992
FBgn0039944	-	CG17162	CG17162	0.0254941	0.835326	0.127191	0.222139	x
FBgn0033497	-	CG12912	CG12912	-0.0561516	0.841138	0.0703925	0.844428
FBgn0034432	-	CG7461	CG7461	-0.0684154	0.841901	0.0209002	0.965981
FBgn0264908	pH-sensitive chloride channel 1	pHCl-1	CG44099	-0.0398903	0.845203	-0.0817608	0.725
FBgn0023076	Clock	Clk	CG7391	-0.0582575	0.847988	0.237965	0.395908	x
FBgn0000564	Eclosion hormone	Eh	CG5400	0.133736	0.851694	-0.220904	0.789
FBgn0250910	Octopamine beta3 receptor	Octbeta3R	CG42244	0.033448	0.852988	-0.0423552	0.856621
FBgn0262475	bruno 2	bru2	CG43065	-0.0263401	0.853886	-0.097637	0.477074
FBgn0040099	lectin-28C	lectin-28C	CG7106	-0.0826736	0.855645	0.0297072	0.96385	x
FBgn0028953	-	CG14478	CG14478	-0.0183076	0.858229	0.0101405	0.945264
FBgn0028484	Activated Cdc42 kinase	Ack	CG14992	0.0403725	0.858374	0.0235599	0.942518
FBgn0030400	Protein interacting with Ttk69 and Sin3A	Pits	CG11138	-0.0219936	0.864287	-0.0831381	0.506552
FBgn0005586	Rab3	Rab3	CG7576	0.0212623	0.870537	0.0424694	0.783756	x
FBgn0031023	-	CG14200	CG14200	-0.0212909	0.870829	-0.0511695	0.726933
FBgn0031575	Centrosomal protein 97kDa	Cep97	CG3980	0.0232201	0.871117	0.147349	0.220057	x
FBgn0264574	Glucose transporter 1	Glut1	CG43946	-0.0280259	0.872136	-0.0461393	0.830772
FBgn0085450	Sno oncogene	Snoo	CG34421	0.0216924	0.87346	-0.0610336	0.677627	x
FBgn0029957	-	CG12155	CG12155	-0.0154839	0.877264	0.123175	0.126583
FBgn0039900	Synaptotagmin 7	Syt7	CG2381	0.0307346	0.877975	-0.110477	0.582362
FBgn0051323	-	CG31323	CG31323	-0.037119	0.88039	-0.0200109	0.95424
FBgn0031519	Fidgetin	Fign	CG3326	0.0614062	0.881689	0.0459406	0.937427	x
FBgn0033192	Corin	Corin	CG2105	-0.058988	0.887675	-0.0657928	0.907769
FBgn0004622	Tachykinin-like receptor at 99D	TkR99D	CG7887	0.0356246	0.890213	-0.113127	0.683728	x
FBgn0029685	-	CG2938	CG2938	0.00905831	0.899804	0.0615617	0.325615
FBgn0000578	enabled	ena	CG15112	0.021249	0.899977	-0.0353512	0.870631
FBgn0028481	-	CG4341	CG4341	-0.0167701	0.90184	-0.0503999	0.739461
FBgn0037770	Arginine methyltransferase 4	Art4	CG5358	0.0172936	0.905698	0.122502	0.328941	x
FBgn0024987	sister-of-Sex-lethal	ssx	CG3056	-0.0433288	0.906918	-0.129793	0.753775
FBgn0259146	fire dancer	fid	CG42261	0.0177507	0.913631	0.0681649	0.693921	x
FBgn0037754	-	CG8500	CG8500	0.0156295	0.914706	0.177665	0.111718
FBgn0035756	unc-13-4A	unc-13-4A	CG32381	-0.0235027	0.918664	0.0820144	0.747029
FBgn0035986	-	CG4022	CG4022	0.0154325	0.918898	-0.0472192	0.785808
FBgn0037831	Chromosome associated protein H2	Cap-H2	CG14685	-0.0144265	0.928345	0.0606791	0.722863
FBgn0000546	Ecdysone receptor	EcR	CG1765	0.0101015	0.934735	-0.0799409	0.476494
FBgn0003345	scalloped	sd	CG8544	-0.0104075	0.935066	-0.0520731	0.697783
FBgn0032946	nervana 3	nrv3	CG8663	-0.0167847	0.935752	-0.0308826	0.910258	x
FBgn0014037	Suppressor of Triplolethal	Su(Tpl)	CG32217	0.00994236	0.940723	0.0277009	0.868558	x
FBgn0028879	-	CG15270	CG15270	-0.016223	0.942817	-0.000510977	0.998898
FBgn0004118	nicotinic Acetylcholine Receptor beta2	nAChRbeta2	CG6798	-0.00804285	0.949246	-0.0356566	0.808864	x
FBgn0036851	-	CG14082	CG14082	-0.0127021	0.952851	-0.0451884	0.863411	x
FBgn0035959	-	CG4911	CG4911	-0.00799217	0.95451	0.0940177	0.450949	x
FBgn0034201	-	CG17290	CG17290	-0.0325175	0.967852	-0.869289	0.130477
FBgn0026376	Ral guanine nucleotide dissociation stimulator-like	Rgl	CG8865	-0.00450594	0.971744	-0.0515296	0.68884	x
FBgn0051635	-	CG31635	CG31635	0.00332206	0.981547	0.00418159	0.980116	x
FBgn0004514	Octopamine-Tyramine receptor	Oct-TyrR	CG7485	0.0140907	0.985979	-0.0821348	0.927331
FBgn0039560	Biorientation Defective 1	BOD1	CG5514	0.00337493	0.986951	0.101452	0.532473
FBgn0041160	comm2	comm2	CG7554	0.00378816	0.988717	-0.266791	0.119296
FBgn0261291	Chemosensory protein A 86a	CheA86a	CG33698	0.00936633	0.991943	0.141864	0.871568
FBgn0003861	transient receptor potential	trp	CG7875	-0.0012024	0.997922	0.200964	0.241268
FBgn0266417	ringmaker	ringer	CG45057	0.000630736	0.998392	-0.0183001	0.949213
Ontology Term Name		Gene Ontology ID		p-value	Genes
regulation of biological process		GO:0050789		2.11219e-14	124
regulation of cellular process		GO:0050794		1.02408e-13	118
biological regulation		GO:0065007		2.05614e-13	130
system development		GO:0048731		4.76303e-11	71
cellular developmental process		GO:0048869		9.07386e-11	70
cell differentiation		GO:0030154		6.19145e-10	68
animal organ morphogenesis		GO:0009887		1.51274e-09	43
nervous system development		GO:0007399		1.95257e-09	52
anatomical structure morphogenesis		GO:0009653		6.9e-09	63
tissue morphogenesis		GO:0048729		2.55016e-08	37
cell development		GO:0048468		2.83913e-08	58
morphogenesis of an epithelium		GO:0002009		4.60528e-08	36
animal organ development		GO:0048513		4.81365e-08	53
anatomical structure development		GO:0048856		5.53569e-08	87
imaginal disc morphogenesis		GO:0007560		9.95782e-08	29
post-embryonic animal organ morphogenesis		GO:0048563		9.95782e-08	29
multicellular organism development		GO:0007275		1.02152e-07	79
tube morphogenesis		GO:0035239		1.08222e-07	33
developmental process		GO:0032502		1.09368e-07	91
post-embryonic animal morphogenesis		GO:0009886		1.619e-07	31
tissue development		GO:0009888		2.19492e-07	48
epithelial tube morphogenesis		GO:0060562		2.53247e-07	31
negative regulation of biological process		GO:0048519		6.34646e-07	60
instar larval or pupal development		GO:0002165		8.28955e-07	33
sensory organ development		GO:0007423		9.46183e-07	30
regulation of nitrogen compound metabolic process		GO:0051171		9.84533e-07	68
imaginal disc-derived appendage morphogenesis		GO:0035114		1.47513e-06	25
appendage morphogenesis		GO:0035107		1.68078e-06	25
epithelium development		GO:0060429		1.68491e-06	44
instar larval or pupal morphogenesis		GO:0048707		1.73619e-06	29
imaginal disc-derived appendage development		GO:0048737		2.31881e-06	25
tube development		GO:0035295		2.60725e-06	37
pattern specification process		GO:0007389		2.62782e-06	31
regulation of developmental process		GO:0050793		2.79332e-06	36
regulation of RNA metabolic process		GO:0051252		2.80241e-06	53
appendage development		GO:0048736		2.80321e-06	25
post-embryonic animal organ development		GO:0048569		4.03854e-06	29
imaginal disc-derived wing morphogenesis		GO:0007476		6.31796e-06	22
metamorphosis		GO:0007552		7.0577e-06	29
multicellular organismal process		GO:0032501		7.46483e-06	100
regulation of nucleobase-containing compound metabolic process		GO:0019219		8.27041e-06	53
negative regulation of macromolecule biosynthetic process		GO:0010558		1.27212e-05	29
negative regulation of cellular macromolecule biosynthetic process		GO:2000113		1.27212e-05	29
regulation of primary metabolic process		GO:0080090		1.29854e-05	66
wing disc morphogenesis		GO:0007472		1.44058e-05	22
regulation of multicellular organismal process		GO:0051239		1.45302e-05	32
regulation of macromolecule metabolic process		GO:0060255		1.67407e-05	70
eye development		GO:0001654		1.67713e-05	25
sensory system development		GO:0048880		1.67713e-05	25
visual system development		GO:0150063		1.67713e-05	25
negative regulation of gene expression		GO:0010629		1.82015e-05	35
generation of neurons		GO:0048699		2.08026e-05	38
post-embryonic development		GO:0009791		2.20237e-05	33
regulation of cellular metabolic process		GO:0031323		2.22635e-05	68
post-embryonic appendage morphogenesis		GO:0035120		2.46327e-05	23
negative regulation of biosynthetic process		GO:0009890		2.96483e-05	29
negative regulation of cellular biosynthetic process		GO:0031327		2.96483e-05	29
neuron differentiation		GO:0030182		3.10028e-05	36
compound eye development		GO:0048749		3.1722e-05	24
regionalization		GO:0003002		3.78119e-05	28
negative regulation of cellular process		GO:0048523		4.73001e-05	51
regulation of cellular biosynthetic process		GO:0031326		4.85962e-05	53
regulation of gene expression		GO:0010468		4.99681e-05	59
cell-cell signaling		GO:0007267		5.24951e-05	25
regulation of biosynthetic process		GO:0009889		5.36876e-05	53
signaling		GO:0023052		5.66537e-05	60
cell communication		GO:0007154		5.68949e-05	61
compound eye morphogenesis		GO:0001745		6.1453e-05	21
chemical synaptic transmission		GO:0007268		6.99638e-05	22
anterograde trans-synaptic signaling		GO:0098916		6.99638e-05	22
trans-synaptic signaling		GO:0099537		7.42605e-05	22
imaginal disc development		GO:0007444		7.70895e-05	30
regulation of cellular macromolecule biosynthetic process		GO:2000112		8.94054e-05	51
regulation of macromolecule biosynthetic process		GO:0010556		0.000101331	51
neurogenesis		GO:0022008		0.000101896	38
eye morphogenesis		GO:0048592		0.000108093	21
sensory organ morphogenesis		GO:0090596		0.000108093	21
cell fate commitment		GO:0045165		0.000112026	22
regulation of metabolic process		GO:0019222		0.000112251	71
synaptic signaling		GO:0099536		0.000125715	22
cell morphogenesis		GO:0000902		0.000142937	29
cell morphogenesis involved in differentiation		GO:0000904		0.000185733	26
negative regulation of RNA metabolic process		GO:0051253		0.000234057	25
positive regulation of cellular process		GO:0048522		0.000236696	55
neuron development		GO:0048666		0.000297559	29
regulation of anatomical structure morphogenesis		GO:0022603		0.000363669	16
embryo development		GO:0009790		0.000398523	28
negative regulation of nucleobase-containing compound metabolic process		GO:0045934		0.000409009	25
positive regulation of biological process		GO:0048518		0.000588485	57
behavior		GO:0007610		0.000622425	29
negative regulation of nitrogen compound metabolic process		GO:0051172		0.000874041	31
neuromuscular synaptic transmission		GO:0007274		0.0009117	11
negative regulation of macromolecule metabolic process		GO:0010605		0.00137539	36
regulation of transcription, DNA-templated		GO:0006355		0.00142191	44
regulation of nucleic acid-templated transcription		GO:1903506		0.00142191	44
regulation of RNA biosynthetic process		GO:2001141		0.00142191	44
regulation of cell differentiation		GO:0045595		0.00162309	19
regulation of multicellular organismal development		GO:2000026		0.00162309	19
cellular process		GO:0009987		0.00197779	166
growth		#N/A		0.00205838	24
compound eye photoreceptor development		GO:0042051		0.00214407	11
cell junction assembly		GO:0034329		0.0022686	17
locomotion		GO:0040011		0.0026586	30
eye photoreceptor cell development		GO:0042462		0.00301927	11
wing disc development		GO:0035220		0.00325039	22
compound eye photoreceptor cell differentiation		GO:0001751		0.00403102	15
negative regulation of metabolic process		GO:0009892		0.00487344	36
eye photoreceptor cell differentiation		GO:0001754		0.00530487	15
negative regulation of cellular metabolic process		GO:0031324		0.00559734	31
positive regulation of nitrogen compound metabolic process		GO:0051173		0.00584705	33
photoreceptor cell differentiation		GO:0046530		0.00677758	16
negative regulation of transcription, DNA-templated		GO:0045892		0.00711667	22
negative regulation of RNA biosynthetic process		GO:1902679		0.00711667	22
negative regulation of nucleic acid-templated transcription		GO:1903507		0.00711667	22
cell junction organization		GO:0034330		0.00769531	21
positive regulation of RNA metabolic process		GO:0051254		0.00838874	24
transcription, DNA-templated		GO:0006351		0.00972938	44
nucleic acid-templated transcription		GO:0006355		0.00972938	44
response to alcohol		GO:0097305		0.00978169	12
synapse assembly		GO:0007416		0.0100293	14
RNA biosynthetic process		GO:0032774		0.010383	44
response to stimulus		GO:0050896		0.0135504	78
photoreceptor cell development		GO:0042461		0.0153016	11
positive regulation of nucleobase-containing compound metabolic process		GO:0045935		0.0157451	24
regulation of cell communication		GO:0010646		0.018364	35
regulation of signaling		GO:0023051		0.018364	35
neuron projection development		GO:0031175		0.0197641	23
neuron projection morphogenesis		GO:0048812		0.0202951	22
morphogenesis of a polarized epithelium		GO:0001738		0.0204508	10
negative regulation of translation		GO:0017148		0.021656	9
cell projection morphogenesis		GO:0048858		0.021911	22
plasma membrane bounded cell projection morphogenesis		GO:0120039		0.021911	22
synapse organization		GO:0050808		0.0227626	18
response to abiotic stimulus		GO:0009628		0.0245605	22
developmental growth		GO:0048589		0.0275537	20
antennal development		GO:0007469		0.0289986	6
cell part morphogenesis		GO:0032990		0.0296401	22
learning or memory		GO:0007611		0.0327018	13
cognition		GO:0050890		0.0327018	13
modulation of chemical synaptic transmission		GO:0050804		0.0349047	12
regulation of trans-synaptic signaling		GO:0099177		0.0349047	12
RNA metabolic process		GO:0016070		0.0369115	58
regulation of biological quality		GO:0065008		0.0375623	45
positive regulation of cellular biosynthetic process		GO:0031328		0.0378495	25
positive regulation of macromolecule metabolic process		GO:0010604		0.0383829	33
positive regulation of biosynthetic process		GO:0009891		0.0390799	25
positive regulation of cellular metabolic process		GO:0031325		0.0393497	33
